# Supplementary material for: Developing efficient small molecule-based organic photo-couplers by optimizing the cathode interfacial layer in the photodetector
Source: Royal Society of Chemistry journal article supplement (doi:10.1039/d3tc00188a), 2023-01-01
Supplement: d3tc00188a1.pdf [file d3tc00188a1.pdf]

## Electronic Supplementary Information

### Developing efficient small molecule-based organic photo-couplers by optimizing the cathode interfacial layer in the photodetector

Richie Estrada,<sup>‡ab</sup> Dian Luo,<sup>‡ac</sup> Chih-Chien Lee,<sup>a</sup> Johan Iskandar,<sup>‡ab</sup> Sajal Biring,<sup>bc</sup> Nurul Ridho Al Amin,<sup>ab</sup> Abdul Khalik Akbar,<sup>b</sup> Chih-Hsin Chen,<sup>d</sup> Chang-Wei Yu,<sup>b</sup> Tran My Dung Pham,<sup>b</sup> Shun-Wei Liu<sup>\*be</sup>

<sup>a</sup> Department of Electronic Engineering, National Taiwan University of Science and Technology, Taipei 10617, Taiwan.

<sup>b</sup> Organic Electronics Research Center, Ming Chi University of Technology, New Taipei City 24301, Taiwan.

<sup>c</sup> College of Photonics, National Yang Ming Chiao Tung University, Tainan 71150, Taiwan.

<sup>d</sup> Department of Chemistry, Tamkang University, New Taipei 251, Taiwan.

<sup>e</sup> Department of Electronic Engineering, Ming Chi University of Technology, New Taipei City 24301, Taiwan.

<sup>‡</sup>R. E, D. L., and J. I. contributed equally to this study.

\*S.-W. L. is corresponding author (E-mail: [swliu@mail.mcut.edu.tw](mailto:swliu@mail.mcut.edu.tw))

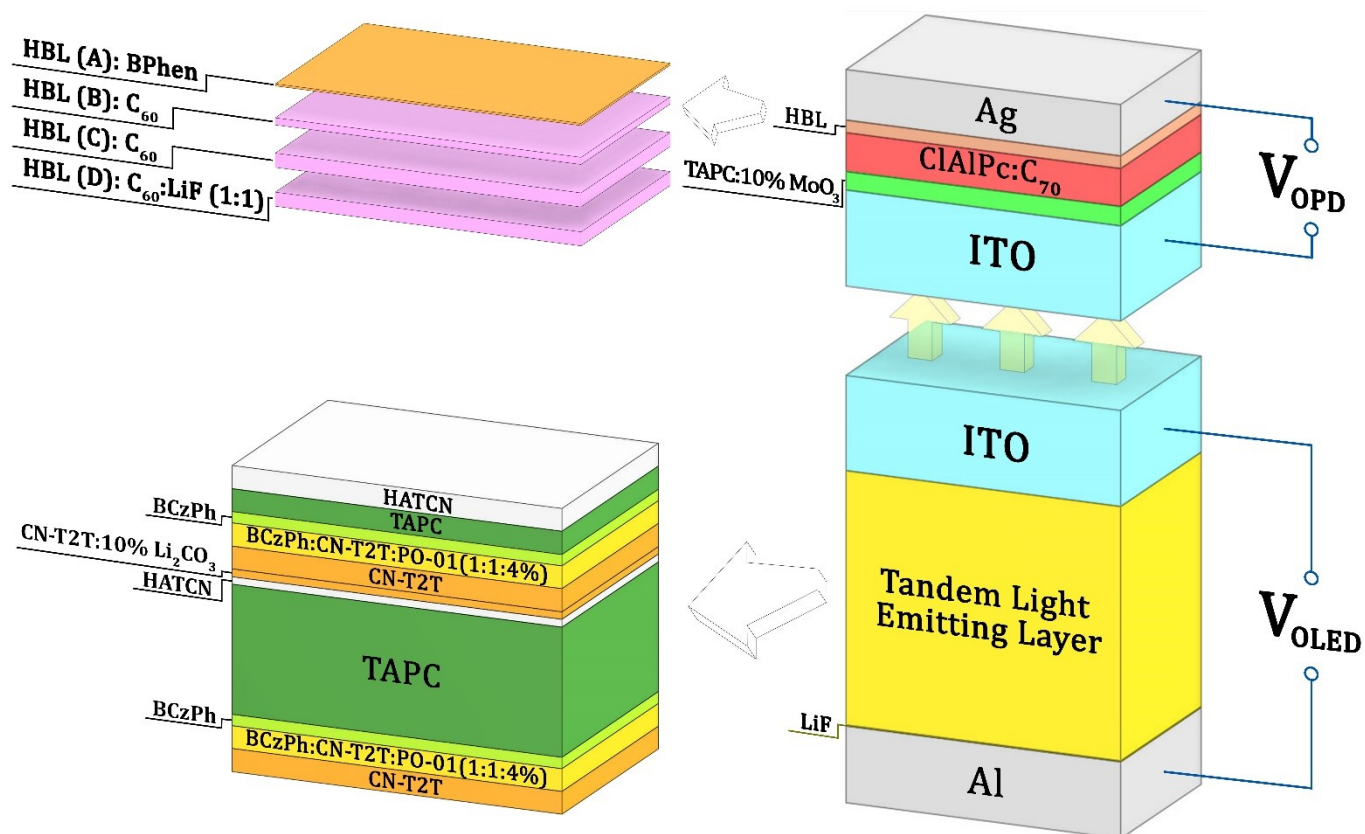

**Fig. S1** Device configuration of an OPC.

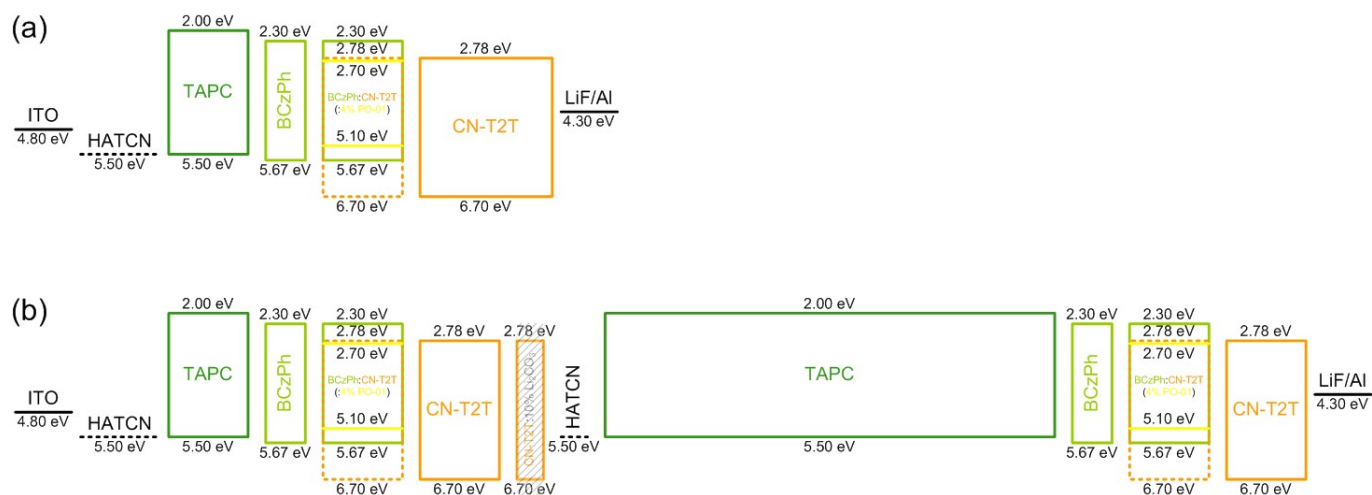

**Fig. S2** Energy level diagram of (a) OLED S and (b) OLED T.

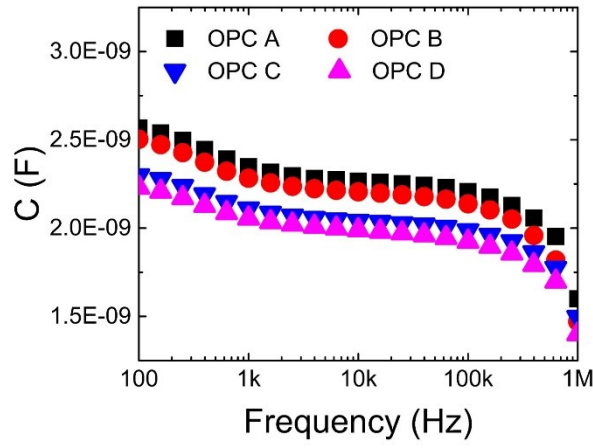

**Fig. S3** The C-f characteristics of OPC A (black square), OPC B (red circle), OPC C (blue down-triangle), and OPC D (purple up-triangle) at a biased of -3 V and measured in the dark conditions.

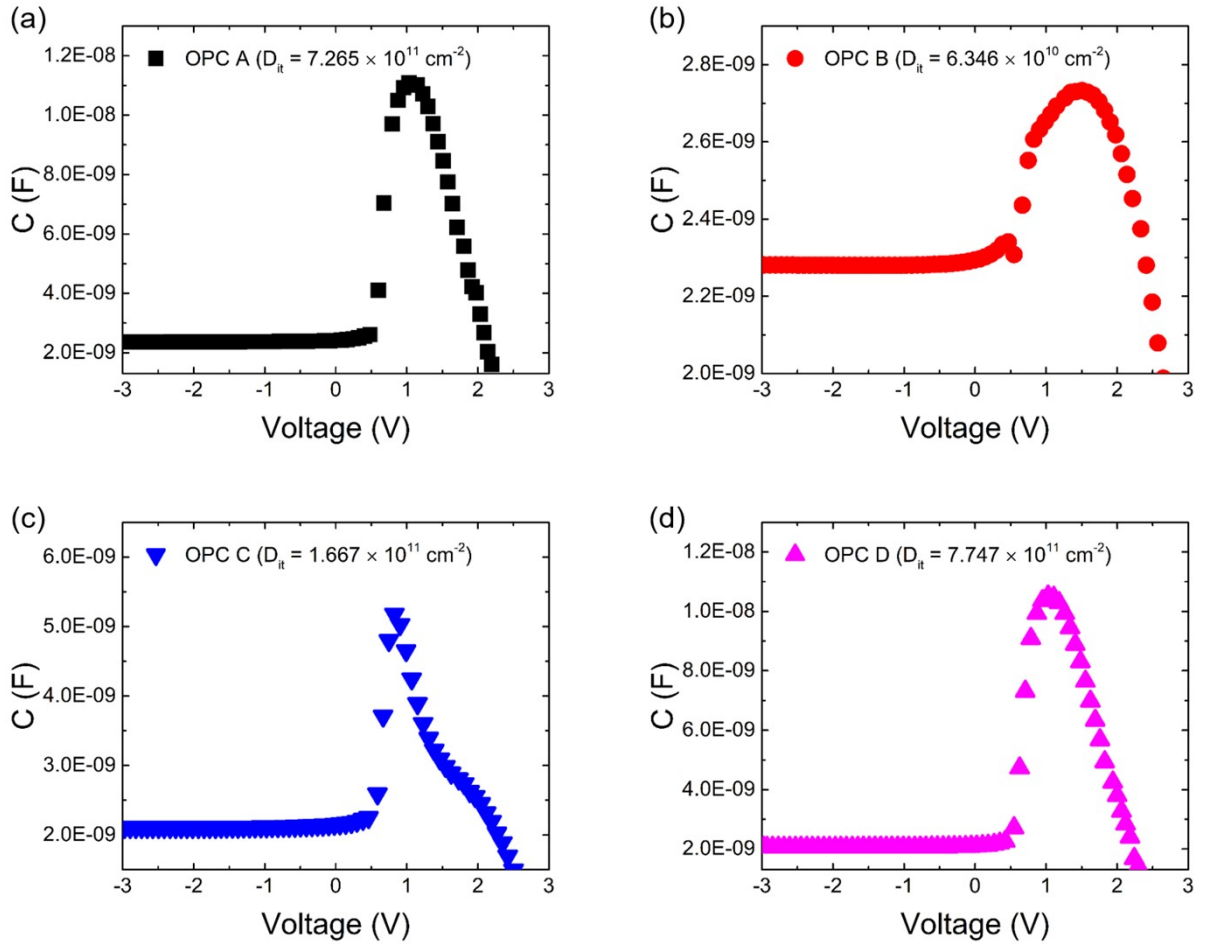

**Fig. S4** The characteristics of C-V for the device of (a) OPC A, (b) OPC B, (c) OPC C, and (d) OPC D. All OPCs are tuned at a frequency of 1 kHz and measured in dark conditions.

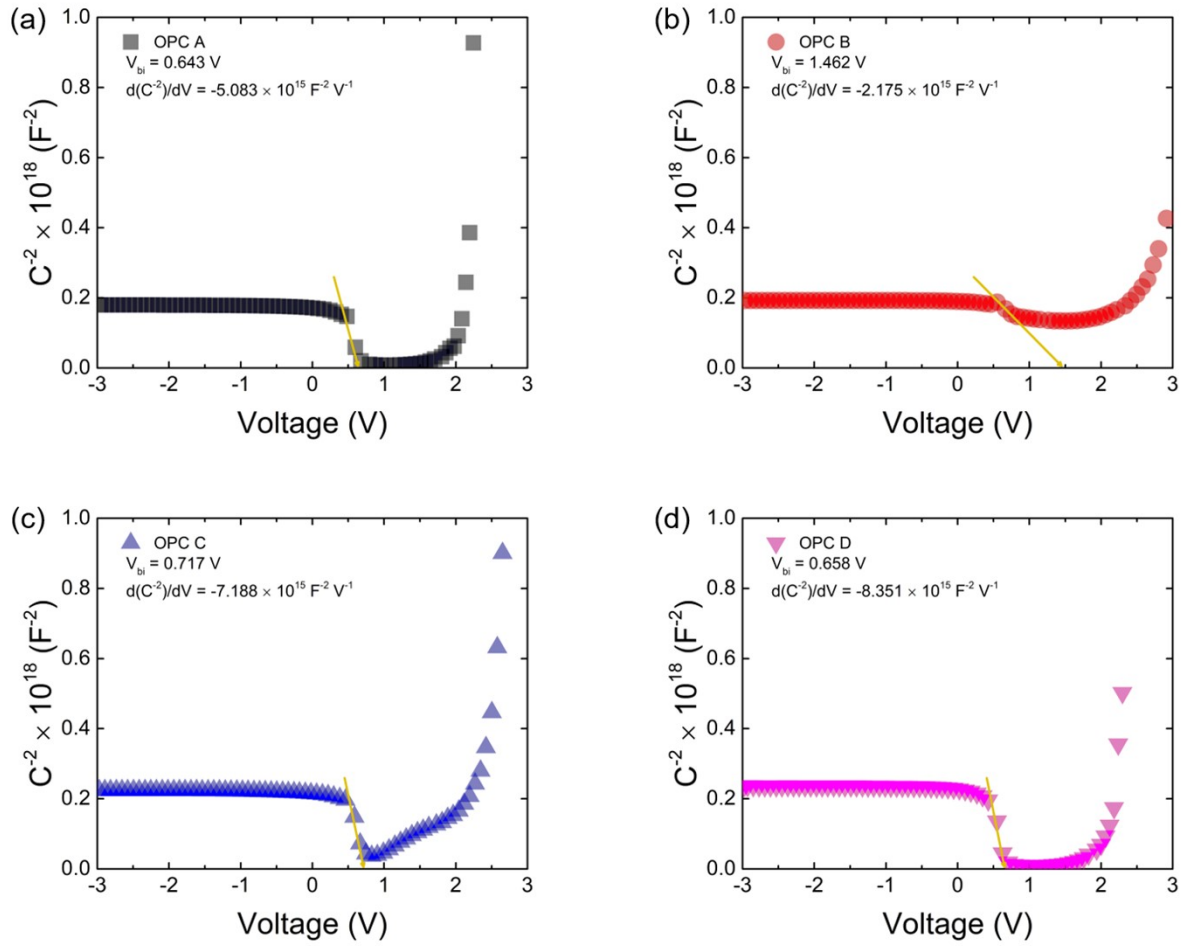

**Fig. S5** The plots of  $C^{-2}$ -V (Mott-Schottky) for the device of (a) OPC A, (b) OPC B, (c) OPC C, and (d) OPC D. All OPCs are tuned at a frequency of 1 kHz and measured in dark conditions.

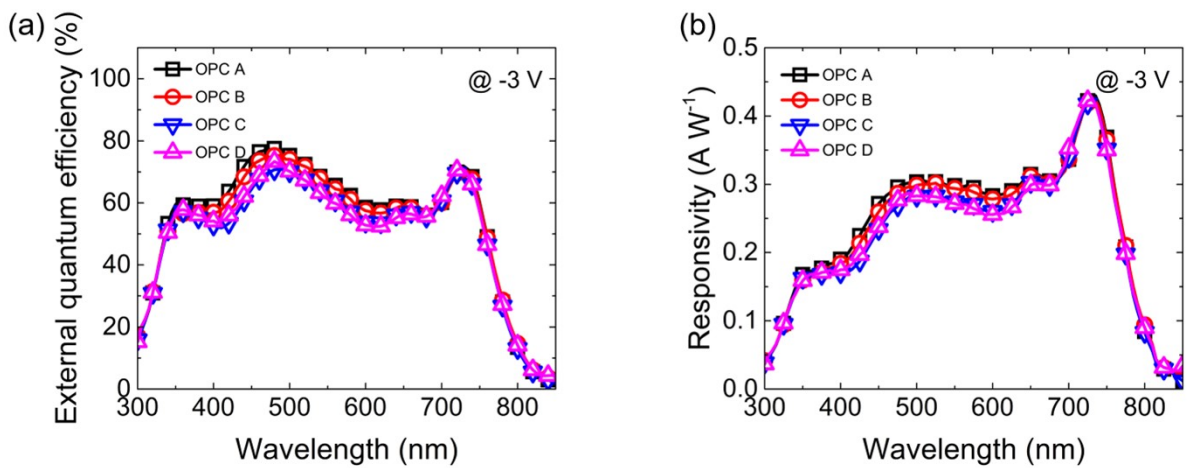

**Fig. S6** The spectral response of the OPC devices under a reverse bias voltage of -3 V. (a) EQE. (b) Responsivity.

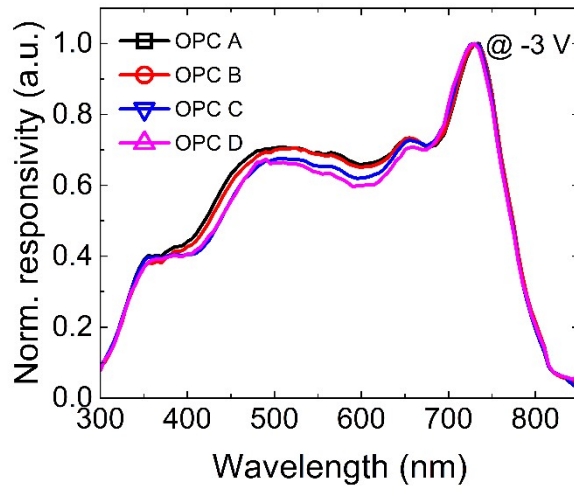

**Fig. S7** The normalized spectral responsivity of the OPC devices under a reverse bias voltage of -3 V.

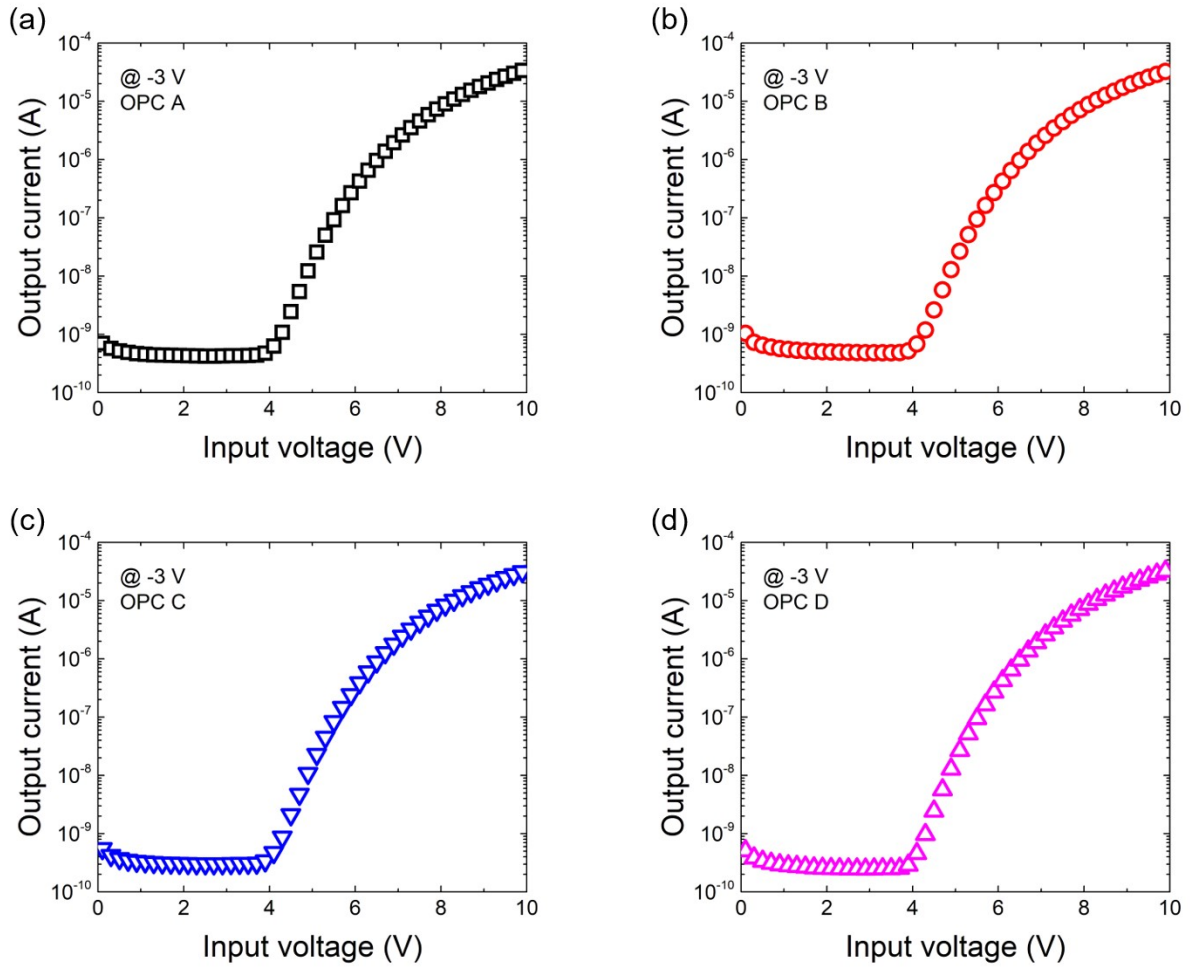

**Fig. S8** The current transfer characteristics of the (a) OPC A, (b) OPC B, (c) OPC C, and (d) OPC D at a biased of -3 V and illuminated with a varied voltage bias.

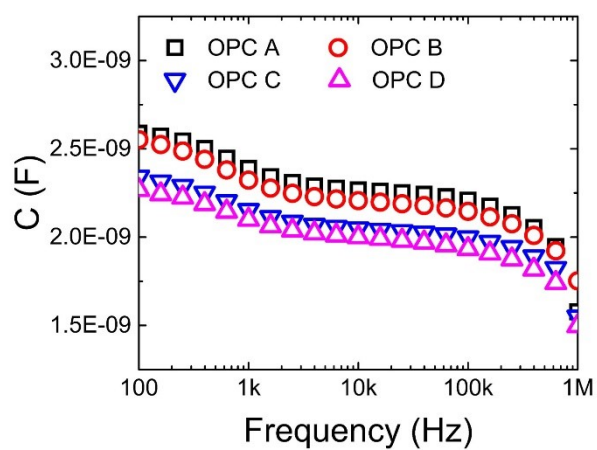

**Fig. S9** The C-f characteristics of OPC A (black square), OPC B (red circle), OPC C (blue down-triangle), and OPC D (purple up-triangle) at a biased of -3 V and measured in the illumination of 1000 cd m<sup>-2</sup>.
